# Supplementary material
Source: PubMed Central journal article supplement (PMC4834971)

## **Supplementary Figure Legends**

### **Supplementary Figure S1. Elimination of Molm-14 from murine c-kit<sup>+</sup> progenitor cells.**

The elimination of Molm-14 cells in murine c-kit<sup>+</sup> progenitor cells isolated from the BM of xenografted animals was analyzed by flow cytometry before (A) and after (B) AC220 treatment. Data is representative of three independent experiments.

### **Supplementary Figure S2. AML exosomes isolated from primary AML patient samples suppressed clonogenicity of c-kit<sup>+</sup> progenitor cells in IF-injection experiments**

(A) AML exosomes were harvested from three different primary AML samples and IF-injected into the femoral cavity alongside contralateral diluent controls of 5 NSG mice. CFU-C assays were performed on murine c-kit<sup>+</sup> progenitor cells isolated from the BM cells of experimental animals after 48 hrs post IF-injection (one was 96 hrs post IF-injection). \* Represents the significance ( $P < 0.05$ ) between the exosome and vehicle treatments determined by pair-t test.

### **Supplementary Figure S3. Viability of AML cells under hypoxic conditions.**

(A) The viability of HL-60 and Molm-14 cells cultured in gas-permeable flasks under normoxia or hypoxia did not differ after more than 22 passages of cell culture.

### **Supplementary Figure S4. NTA profile of leukemia exosomes.**

Leukemia exosomes were isolated from the culture media of Molm-14 or HL-60 cells after 48 hrs culture under hypoxia or normoxia condition with 10% VF-FBS/RMPI media. (A) NTA measurement of the size and concentration of HL-60 exosomes. (B) NTA measurement of the size and concentration of Molm-14 exosomes.

### **Supplementary Figure S5. AML exosomes down-regulated HSC maintenance factors in primary murine BM stroma.**

(A) HSC maintenance factors (*Scf*, *Cxcl12* and *Angpt1*) in primary mouse BM stroma were down-regulated after culture with Molm-14 exosomes for 48 hrs. Data represents two different primary cell isolates with three replicates. S1-S6 represent six individual samples.

# Supplementary Figure S1

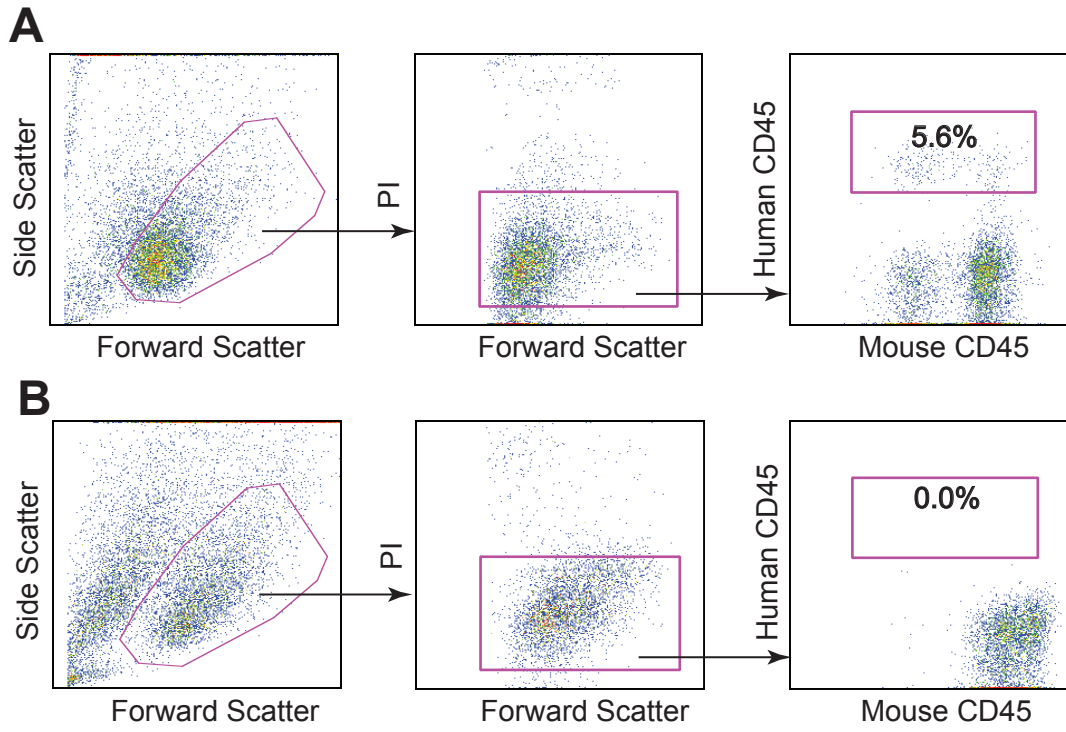

# Supplementary Figure S2

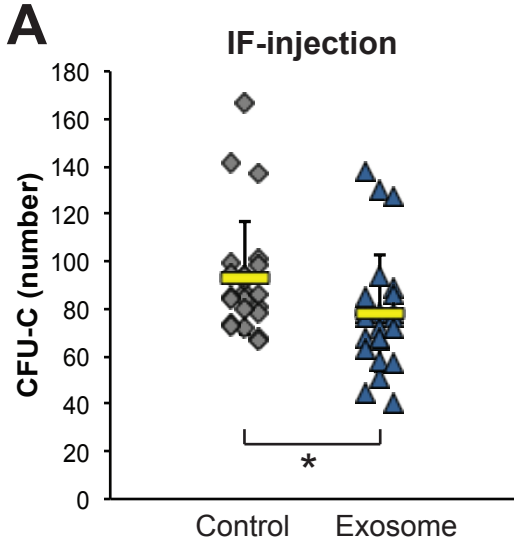

# Supplementary Figure S3

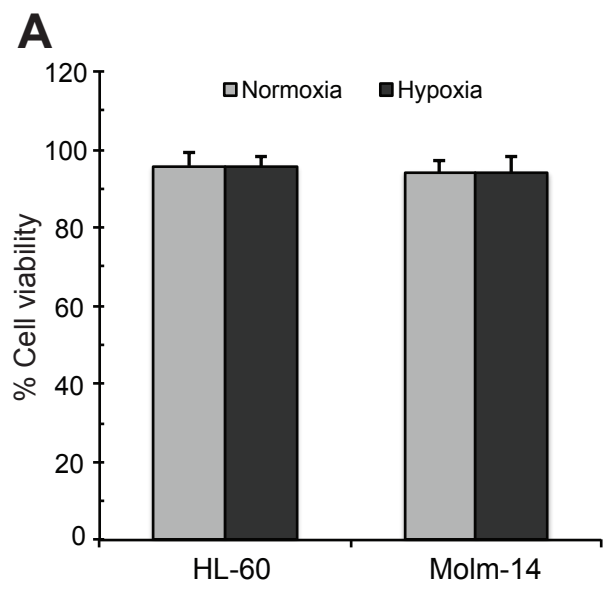

# Supplementary Figure S4

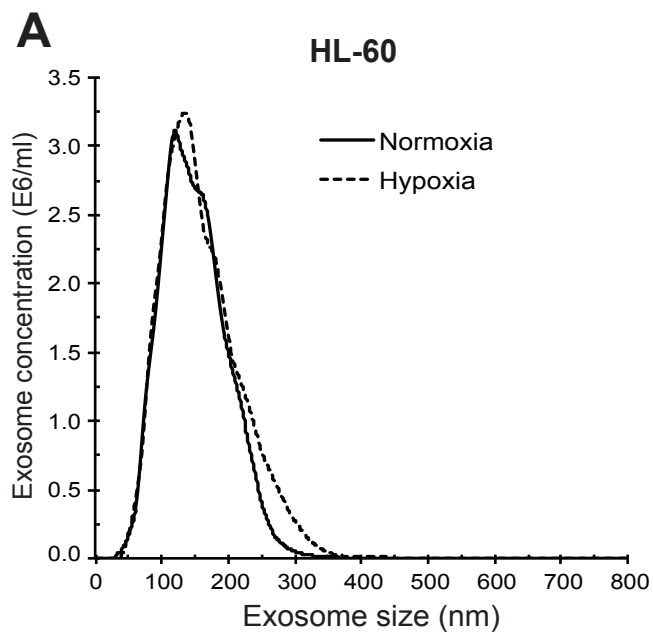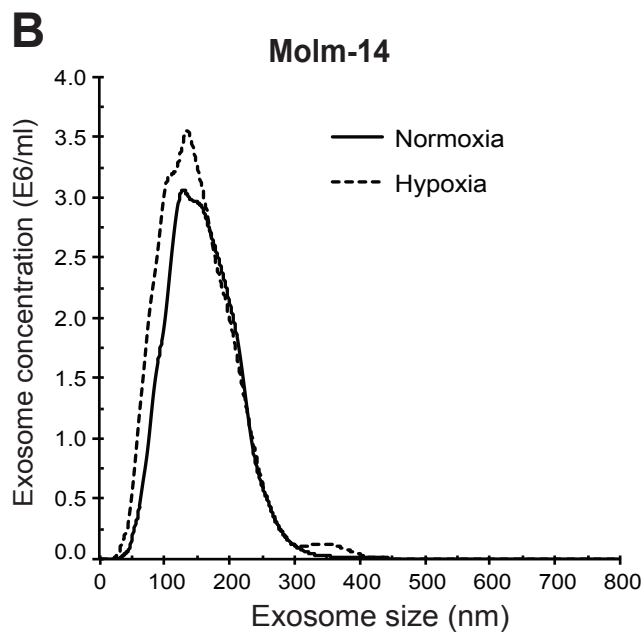

# Supplementary Figure S5

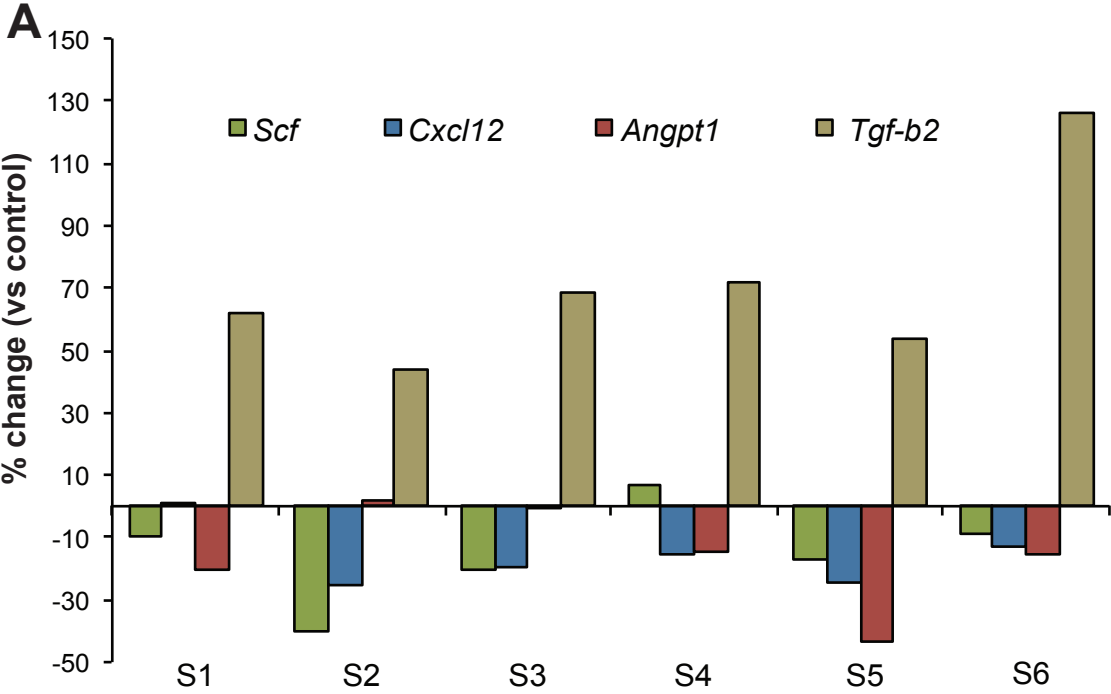

Supplement: NIHMS769112-supplement-Supplemental_Figures.pdf [file NIHMS769112-supplement-Supplemental_Figures.pdf]
